# Supplementary material for: Correlation of the stoichiometries of poly(ε-caprolactone) and α-cyclodextrin pseudorotaxanes with their solution rheology and the molecular orientation, crystallite size, and thermomechanical properties of their nanofibers
Source: Royal Society of Chemistry journal article supplement (doi:10.1039/c6ra23536k), 2016-01-01
Supplement: c6ra23536k1.pdf [file c6ra23536k1.pdf]

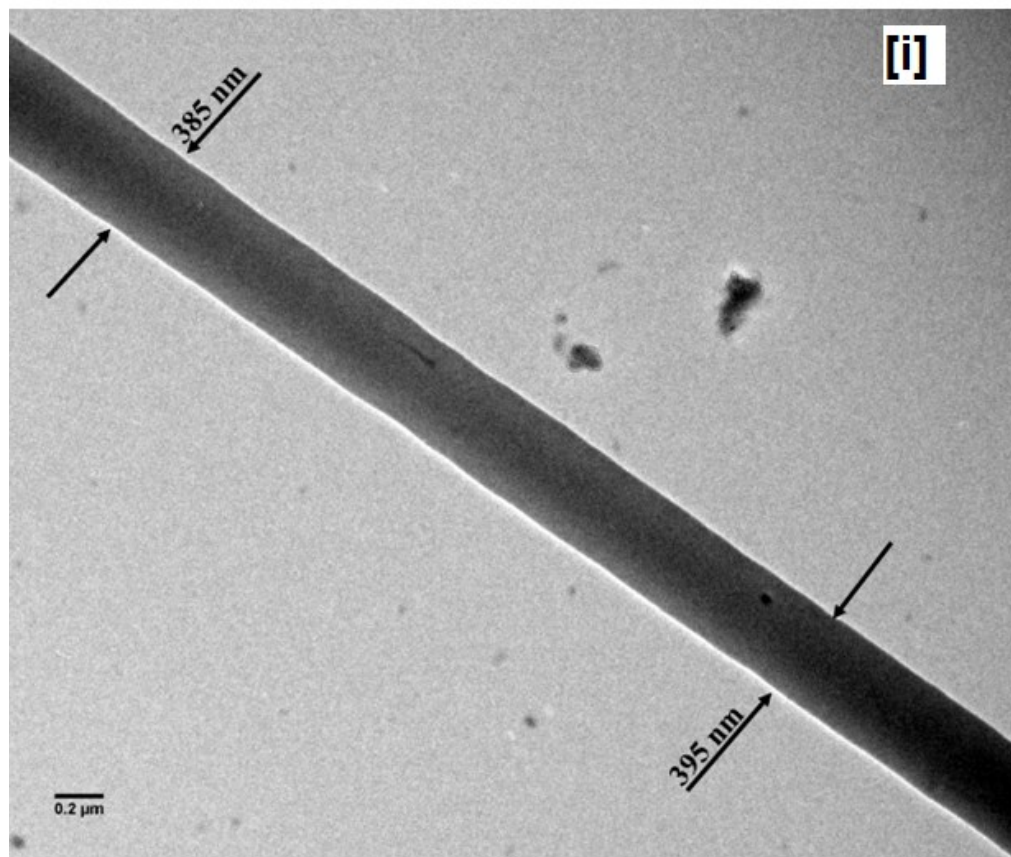

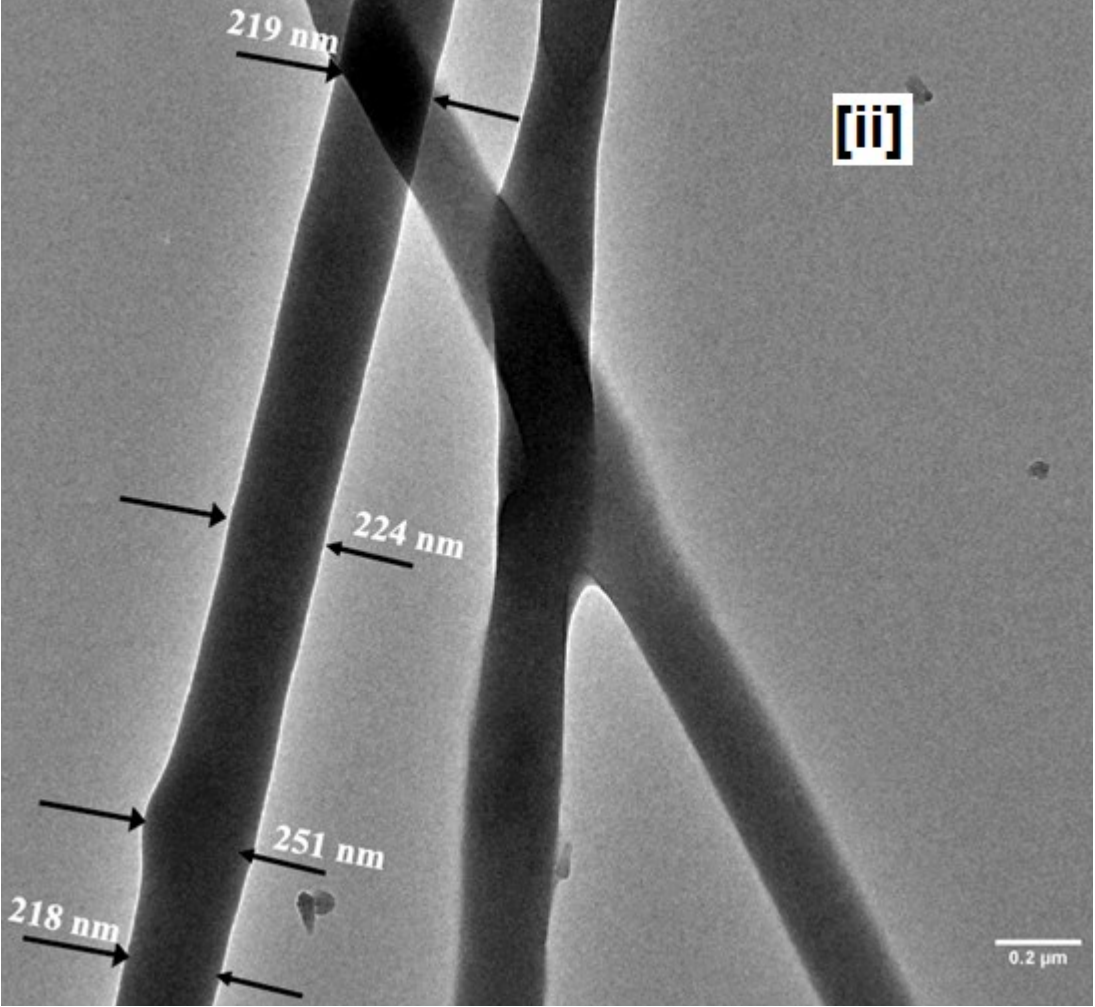

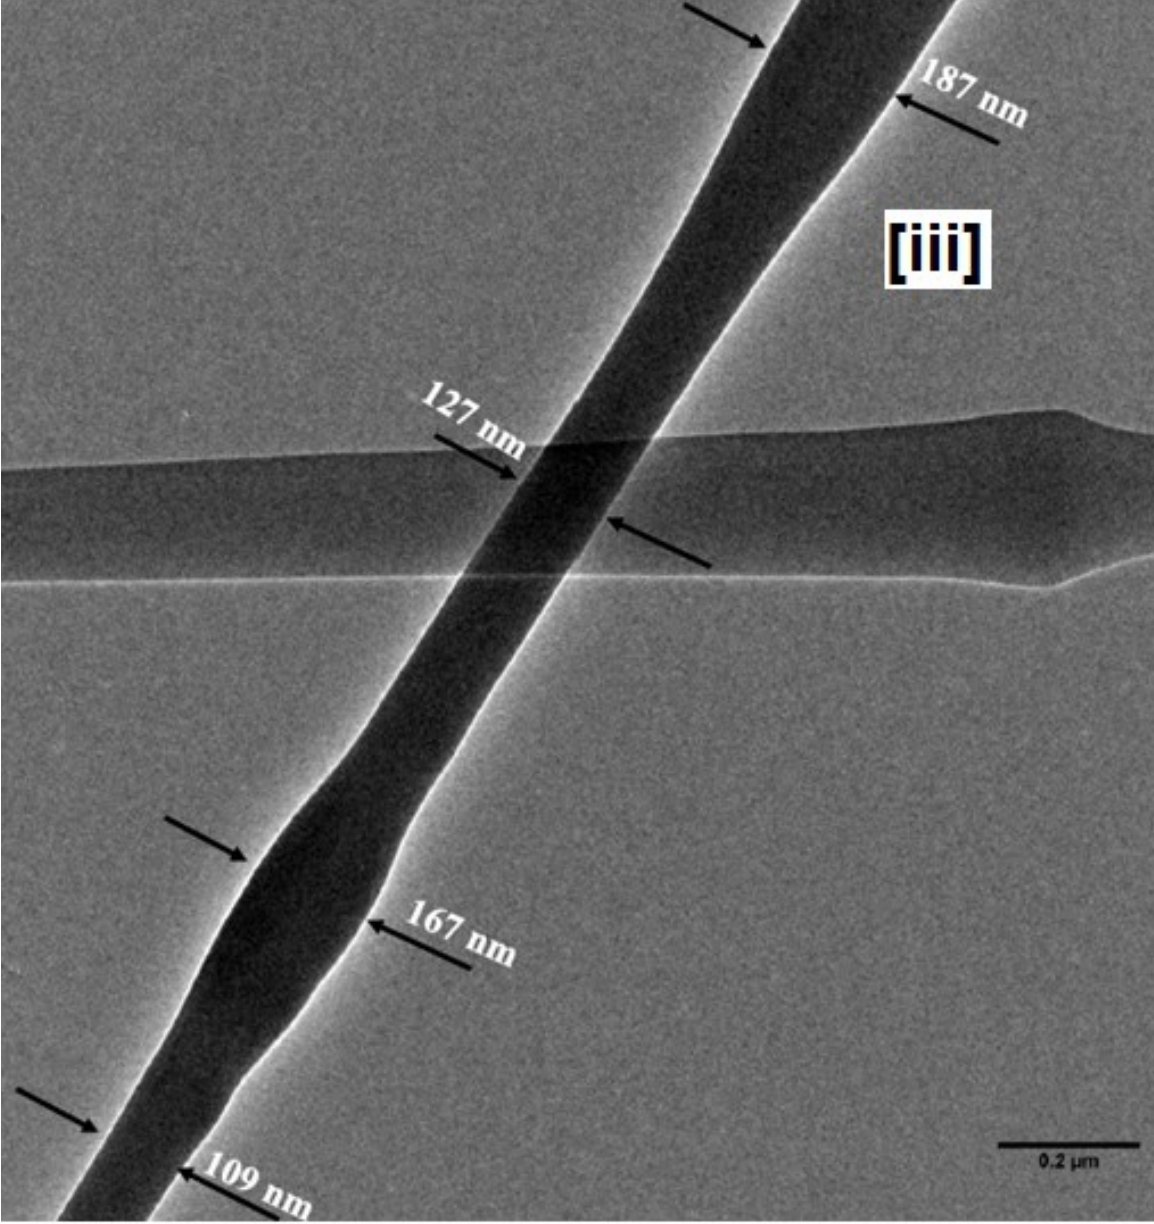

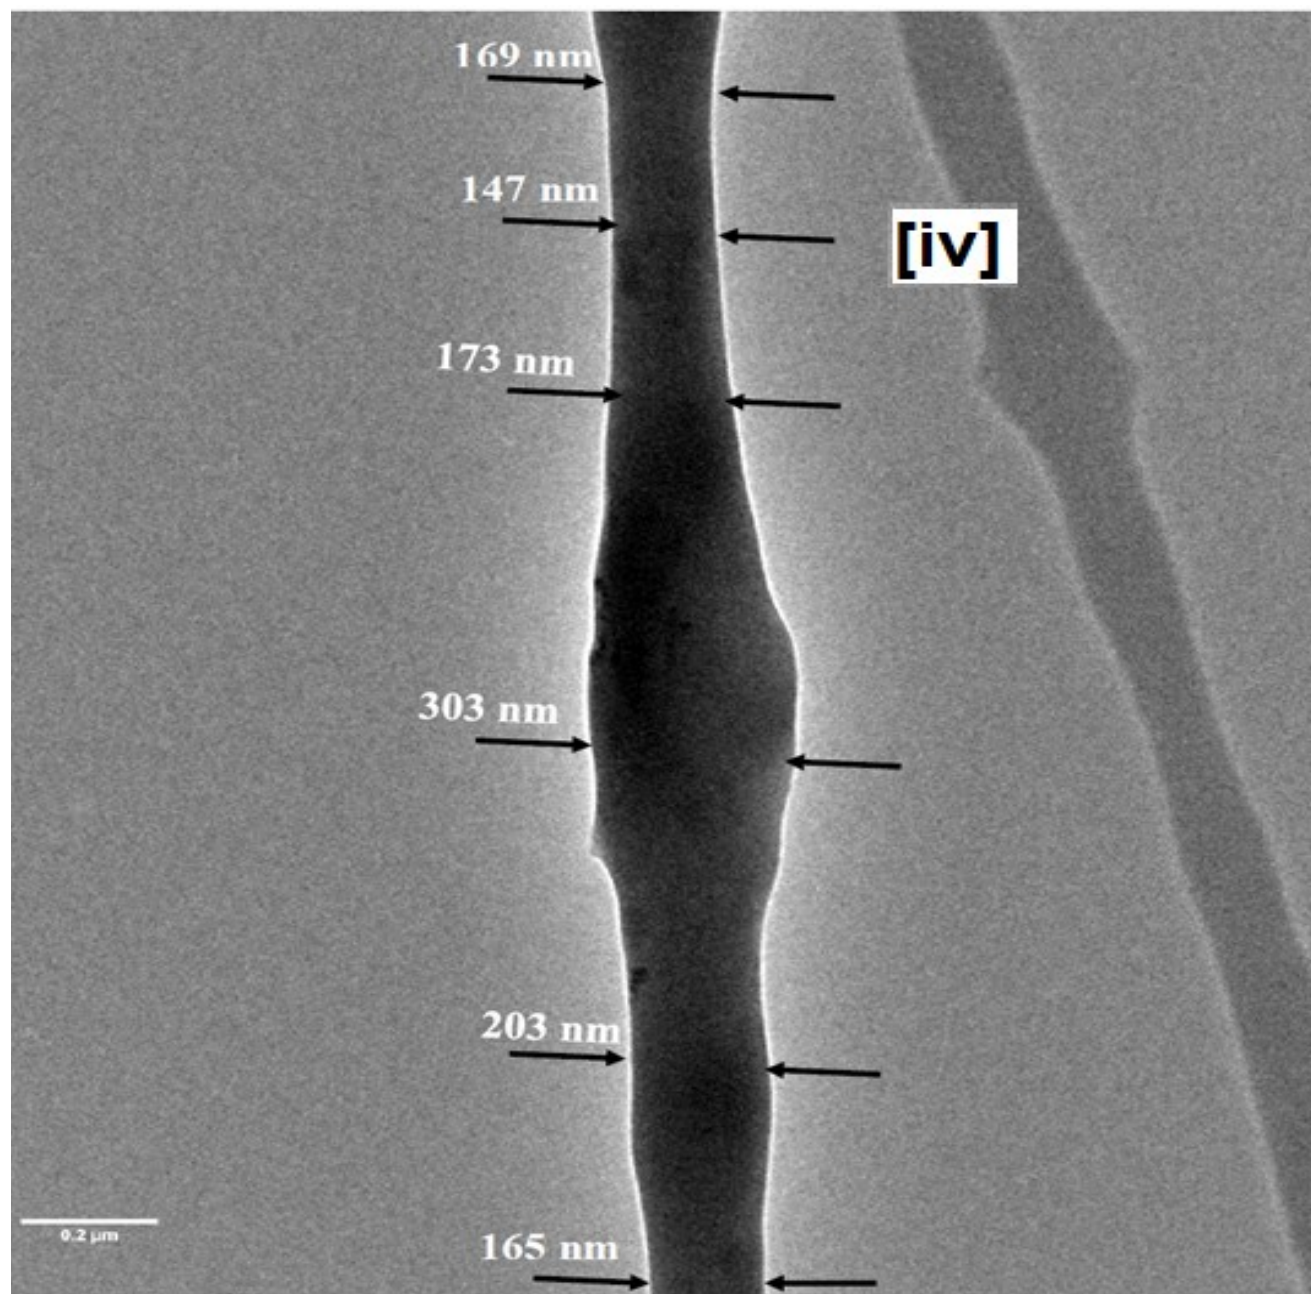

**Figure S1: Heterogenic nature of the electrospun PCL and pseudorotaxane nanofibers. (i) Homogenous RA/neat PCL nanofibers, (ii) slight heterogeneity observed in RA/P-3 nanofibers, Heterogeneous nature of (iii) RA/P-6 and (iv) RA/P-12 nanofibers due to high elastic nature of the polymer solutions.**



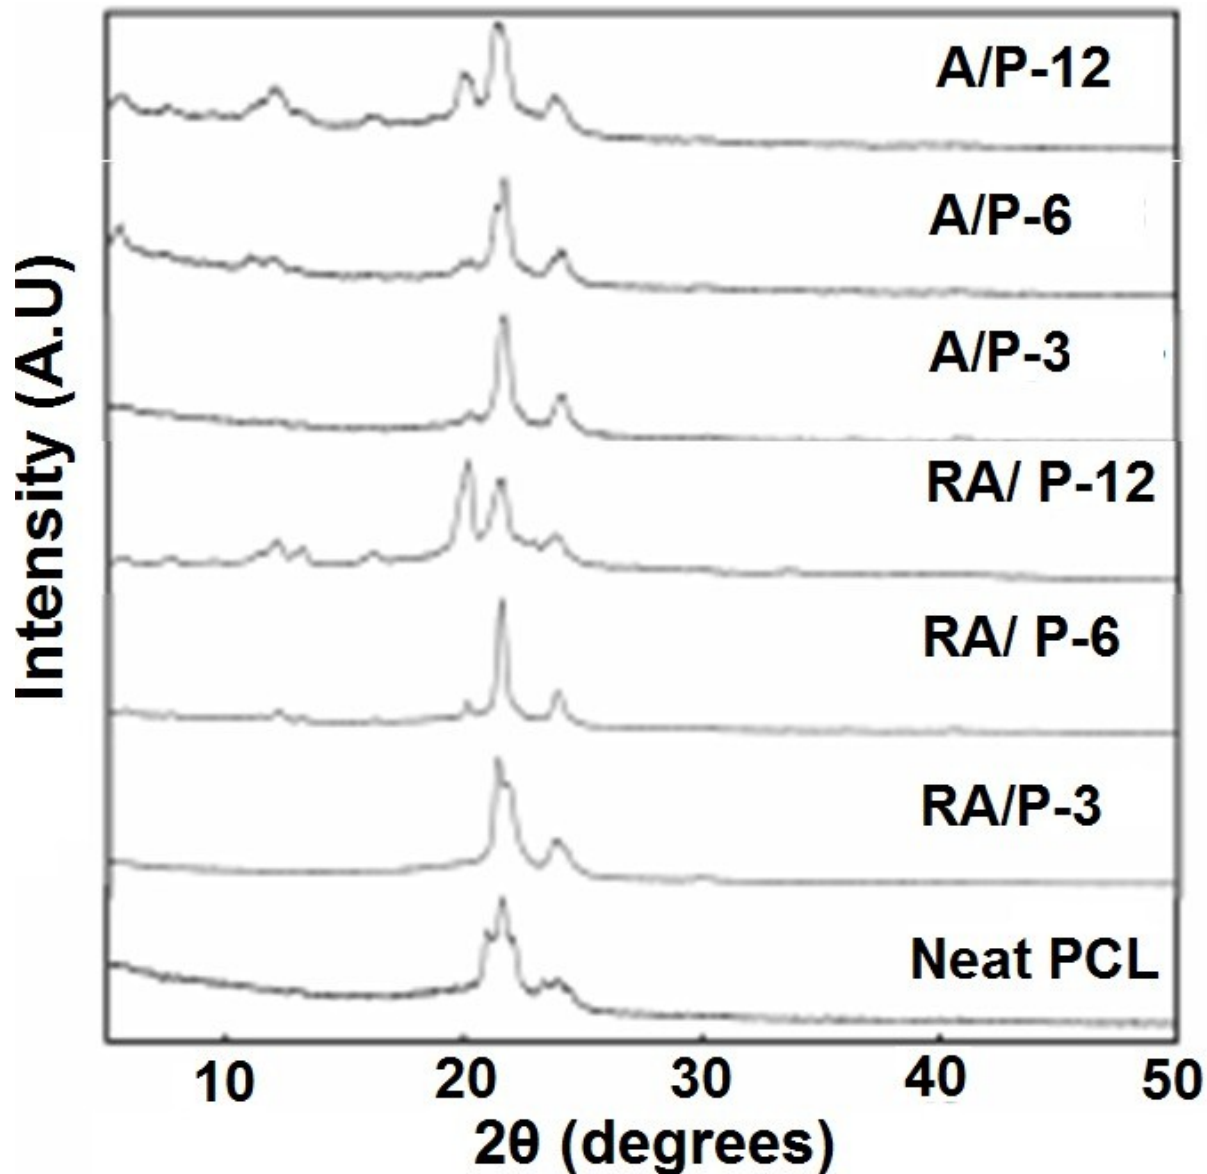

Figure S2: 1D-WAXD patterns of A- and RA- nanofibers of neat PCL and pseudorotaxanes. Neat PCL show crystal reflections at  $2\theta = 22$  and  $24^\circ$  corresponding to (110) and (200) reflections respectively, while upon complexation with CDs, the pseudorotaxane show an additional peak at  $20^\circ$  corresponding to channel structure of the CDs. The intensity of this peak depends on the stoichiometric ratio between the CD:PCL, where pseudorotaxanes with larger coverages show this reflection with higher intensity (P-12>P-6>P-3).

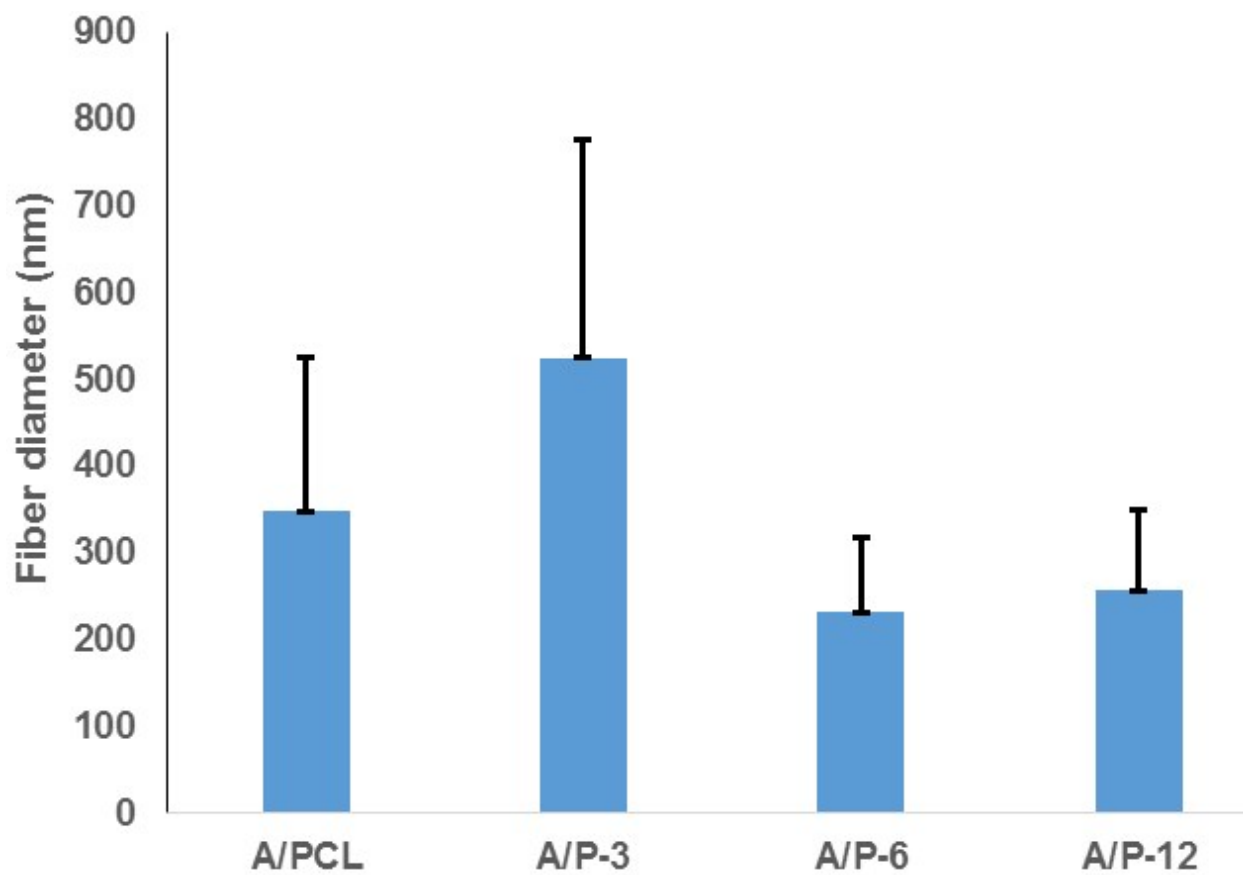

**Figure S3: Fiber diameter values of A-nanofibers. A marked decrease in fiber diameter values of A/PCL is observed (compared to RA-nanofibers), while the diameter values of pseudorotaxanes especially higher stoichiometric ones do not show a marked decrease illustrating additional mechanical force do not cause extensive stretching of the jet.**

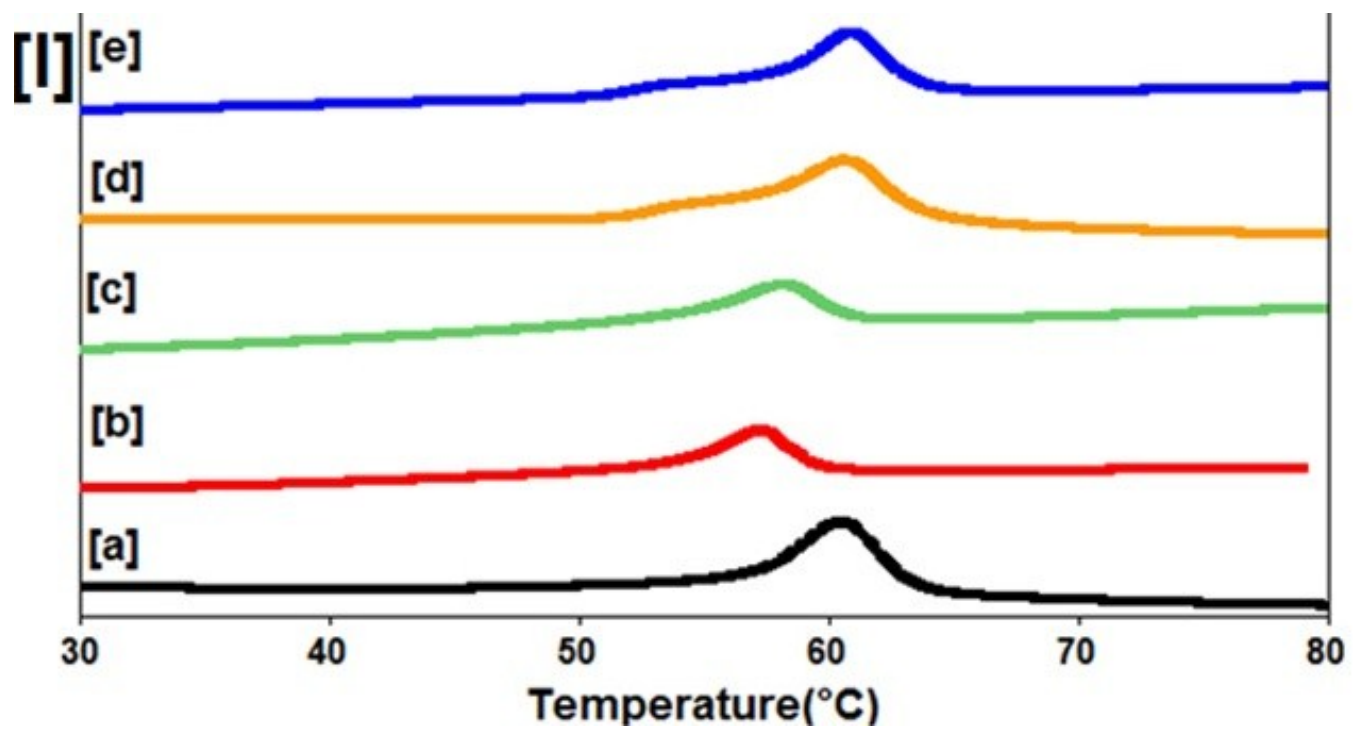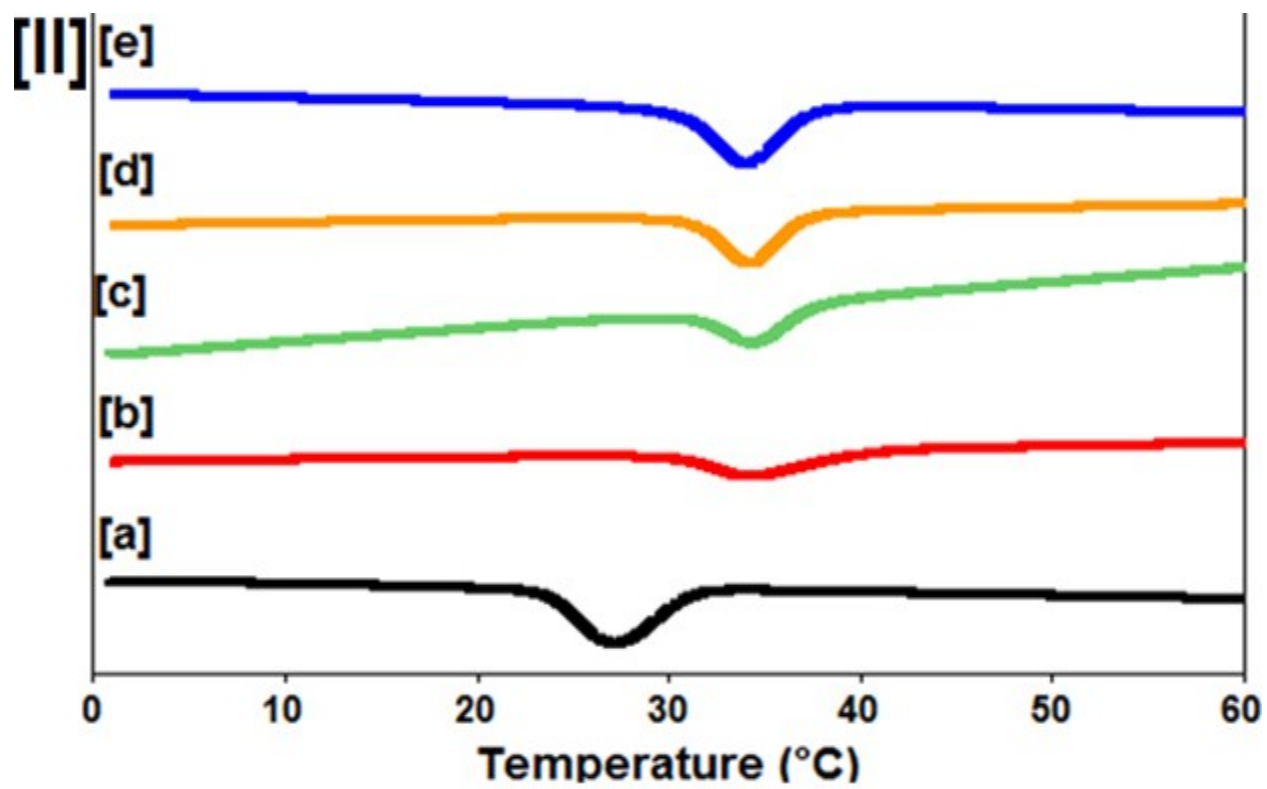

**Figure S4. Thermal analyses of electrospun neat PCL and pseudorotaxanes electrospun from chloroform. (I) First melting cycle from 30 to 80 °C, at the rate of 20 °C/min. (II) First cooling cycle from 80 to 0 °C, at the rate of 20 °C/min (data is shown only from 60 °C). (a) Neat PCL, (b) Uncomplexed PCL/40%  $\alpha$ -CD, (c) P-6 (CFM/DMF), (d) P-3 (CFM), (e) P-6 (CFM). Adapted with permission from ref [1]. Copyright American Chemical Society 2016.**

#### **References:**

[1] Narayanan G, Aguda R, Hartman M, Chung C-C, Boy R, Gupta BS, et al. Fabrication and Characterization of Poly( $\epsilon$ -caprolactone)/ $\alpha$ -Cyclodextrin Pseudorotaxane Nanofibers. *Biomacromolecules*. 2016;17:271-9.
